# Supplementary material
Source: bioRxiv or medRxiv preprint supplement (https://www.biorxiv.org/highwire/filestream/110500/field_highwire_adjunct_files/1/362277-2.pdf)
Supplement: Supplementary file [file 362277-2.pdf]

**B**

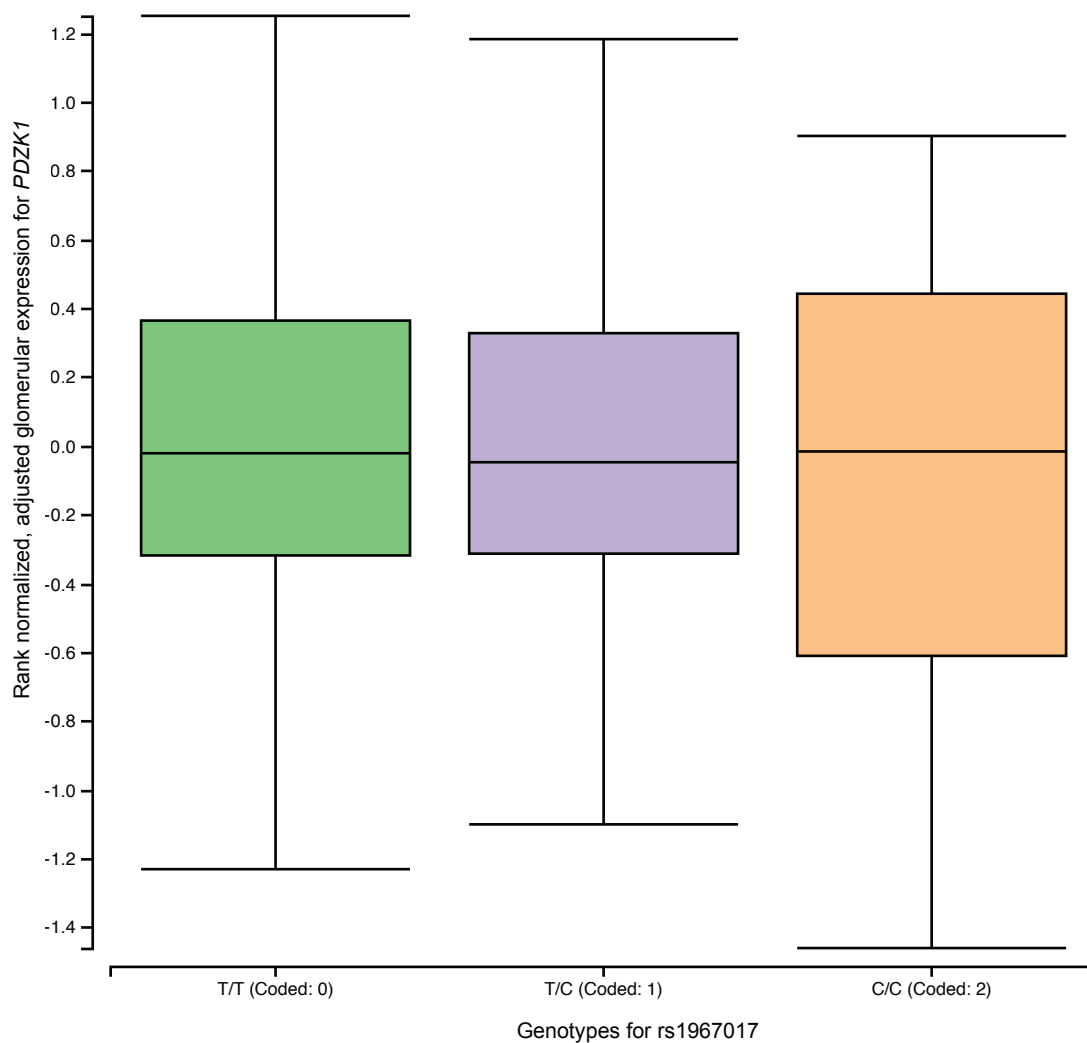

**Figure S1. (B) eQTL box plot of *rs1967017* and *PDZK1* expression in the glomerulus.**

Genotype association of *rs1967017* with *PDZK1* expression in the renal glomerulus was retrieved from Gillies *et al.* (<https://www.biorxiv.org/content/early/2018/03/15/281162>). There was no evidence for association ( $P > 0.05$ ).
